# Supplementary material for: A probabilistic generative model for GO enrichment analysis
Source: PubMed Central journal article supplement — Nucleic Acids Res. 2008 Aug 1;36(17):e109. doi: 10.1093/nar/gkn434 (PMC2553574; doi:10.1093/nar/gkn434), 2008-08-01
Supplement: gkn434_3.pdf [file gkn434_3.pdf]

Supplementary Tables for:  
**A Probabilistic Generative Model for GO Enrichment Analysis**

**Contents**

|                                                        |          |
|--------------------------------------------------------|----------|
| <b>Supplementary Table 1-2 (random gene sets)</b>      | <b>2</b> |
| <b>Supplementary Table 3 (yeast cell cycle phases)</b> | <b>3</b> |
| <b>Supplementary Table 4 (amino acid starvation)</b>   | <b>5</b> |
| <b>Supplementary Table 5 (Swi6 targets)</b>            | <b>6</b> |
| <b>Supplementary Table 6 (E2F1 targets)</b>            | <b>7</b> |

**Supplementary Table 1: Analysis of random gene sets.**

| Random Genes | Classic | Parent-Child | Elim | Weight | GenGO |
|--------------|---------|--------------|------|--------|-------|
| 1%           | 69%     | 100%         | 67%  | 64%    | 100%  |
| 5%           | 0%      | 83%          | 74%  | 71%    | 98%   |
| 10%          | 0%      | 7%           | 51%  | 44%    | 100%  |

Supplementary Table 1: 1%, 5%, and 10% of all human genes were randomly selected as a test set, and the five algorithms were run to identify significant categories. Categories were only selected if they achieved a p-value < 0.001 following Bonferroni correction for multiple hypothesis testing. The procedure is repeated 100 times, and the percentages of sets *without* any significant GO categories are listed in the table. As can be seen, while GenGO correctly determined that there were no significant categories in more than 98% of tests, other methods identified much more erroneous categories in these experiments.

**Supplementary Table 2: Additional analysis of random gene sets.**

| Random Genes | Hypergeometric | Parent-Child | Elim | Weight | GenGO |
|--------------|----------------|--------------|------|--------|-------|
| 0.1%         | 87%            | 100%         | 23%  | 19%    | 98%   |
| 0.2%         | 13%            | 90%          | 22%  | 23%    | 98%   |
| 0.5%         | 0%             | 42%          | 2%   | 11%    | 89%   |

Supplementary Table 2: 0.1%, 0.2%, and 0.5% genes from each level-2 categories (“biological\_process” being at level 1) were selected into a test set, and the five algorithms were run to identify significant categories. The procedure is repeated 100 times, and the percentages of sets without any significant GO categories are listed in the table. Categories were only selected if they achieved a p-value < 0.001 following Bonferroni correction for multiple hypothesis testing.

**Supplementary Table 3: GO Analysis of yeast cell cycle genes in different phases**

|             | <b>Classic</b>                               | <b>Parent-Child</b>             | <b>Elim</b>                                 | <b>Weight</b>                               | <b>GenGO</b>                                    |
|-------------|----------------------------------------------|---------------------------------|---------------------------------------------|---------------------------------------------|-------------------------------------------------|
| <b>G1</b>   | DNA replication                              | DNA metabolic process           | mitotic sister chromatid cohesion           | DNA strand elongation during DNA replica... | DNA replication                                 |
|             | DNA-dependent DNA replication                | cell cycle                      | lagging strand elongation                   | mitotic sister chromatid cohesion           | mitotic sister chromatid cohesion               |
|             | DNA metabolic process                        | cell cycle process              | microtubule nucleation                      | DNA repair                                  | microtubule nucleation                          |
|             | DNA strand elongation during DNA replication | DNA replication                 | mismatch repair                             | microtubule nucleation                      | telomere maintenance via recombination          |
|             | DNA strand elongation                        | response to endogenous stimulus | leading strand elongation                   | DNA replication                             | septin cytoskeleton organization and biogenesis |
| <b>S</b>    | sulfur metabolic process                     | sulfur metabolic process        | sulfate assimilation                        | chromatin assembly or disassembly           | sulfur metabolic process                        |
|             | sulfur amino acid metabolic process          |                                 | chromatin assembly or disassembly           | sulfur amino acid metabolic process         | chromatin assembly or disassembly               |
|             | sulfur amino acid biosynthetic process       |                                 | methionine biosynthetic process             | sulfate assimilation                        | microtubule-based process                       |
|             | sulfur compound biosynthetic process         |                                 | microtubule nucleation                      | microtubule nucleation                      |                                                 |
|             | sulfur utilization                           |                                 | mitotic spindle organization and biogene... | mitotic spindle organization and biogene... |                                                 |
| <b>S/G2</b> |                                              |                                 | nuclear migration, microtubule-mediated     | nuclear migration, microtubule-mediated     | nuclear migration, microtubule-mediated         |
|             |                                              |                                 | methionine metabolic process                | methionine metabolic process                | methionine metabolic process                    |
|             |                                              |                                 | negative regulation of microtubule depol... | response to xenobiotic stimulus             | amine transport                                 |
|             |                                              |                                 | amino acid biosynthetic process             | organelle inheritance                       | polysaccharide biosynthetic process             |
|             |                                              |                                 | amino acid transport                        | axial bud site selection                    | axial cellular bud site selection               |
| <b>G2/M</b> | cation transport                             | ion transport                   | cation transport                            | iron ion transport                          | cation transport                                |
|             | ion transport                                |                                 | DNA unwinding during                        | DNA unwinding during                        | DNA unwinding during                            |

|             |                                                               |                        |                                             |                                             |                                                               |
|-------------|---------------------------------------------------------------|------------------------|---------------------------------------------|---------------------------------------------|---------------------------------------------------------------|
|             |                                                               |                        | replication                                 | replication                                 | replication                                                   |
|             | metal ion transport                                           |                        | siderophore-iron transport                  | arginine catabolic process                  | amino acid catabolic process                                  |
|             | iron ion transport                                            |                        | arginine catabolic process                  | nuclear division                            | polyamine transport                                           |
|             | transition metal ion transport                                |                        | nuclear division                            | ATP transport                               | G1-specific transcription in mitotic cell cycle               |
| <b>M-G1</b> | response to pheromone during conjugation with cellular fusion | multi-organism process | hexose transport                            | response to pheromone during conjugation... | response to pheromone during conjugation with cellular fusion |
|             | response to pheromone                                         | carbohydrate transport | pheromone-dependent signal transduction ... | hexose transport                            | monosaccharide transport                                      |
|             | conjugation with cellular fusion                              | response to pheromone  | agglutination during conjugation with ce... | N-terminal protein lipidation               | protein myristoylation                                        |
|             | conjugation                                                   |                        | N-terminal protein lipidation               | N-terminal protein myristoylation           | pre-replicative complex formation                             |
|             | sexual reproduction                                           |                        | N-terminal protein myristoylation           | pre-replicative complex formation           | telomere maintenance via recombination                        |

Supplementary Table 2: Top five GO categories identified by different methods from yeast cell cycle genes whose expression peak in each cell cycle phase (Spellman et al. 1998).

**Supplementary Table 4: Categories for amino acid starvation**

| <b>Classic</b>                              | <b>Parent-Child</b>                         | <b>Elim</b>                     | <b>Weight</b>                                   | <b>GenGO</b>                     |
|---------------------------------------------|---------------------------------------------|---------------------------------|-------------------------------------------------|----------------------------------|
| nitrogen compound metabolic process         | nitrogen compound metabolic process         | arginine biosynthetic process   | amino acid biosynthetic process                 | amino acid biosynthetic process  |
| carboxylic acid metabolic process           | organic acid metabolic process              | glutamate biosynthetic process  | glutamate metabolic process                     | sulfur metabolic process         |
| organic acid metabolic process              | amino acid and derivative metabolic process | sulfate assimilation            | sulfur amino acid metabolic process             | amino acid catabolic process     |
| amino acid metabolic process                | amine metabolic process                     | transposition, RNA-mediated     | main pathways of carbohydrate metabolic process | purine base metabolic process    |
| amino acid and derivative metabolic process | cellular biosynthetic process               | methionine biosynthetic process | glutamine family amino acid catabolic process   | monosaccharide catabolic process |

Supplementary Table 3: Top five GO categories identified by different methods from the list of yeast genes induced following amino acid starvation (Gasch et al. 2000).

**Supporting Table 5: Categories for Swi6 targets identified by ChIP-chip experiments.**

| <b>Hypergeometric</b>                        | <b>Parent-Child</b>            | <b>Elim</b>                                            | <b>Weight</b>                                          | <b>GenGO</b>                                                 |
|----------------------------------------------|--------------------------------|--------------------------------------------------------|--------------------------------------------------------|--------------------------------------------------------------|
| cell cycle                                   | cell cycle                     | regulation of cyclin-dependent protein kinase activity | regulation of cyclin-dependent protein kinase activity | cell cycle                                                   |
| mitotic cell cycle                           | cell cycle process             | G1/S-specific transcription in mitotic cell cycle      | interphase of mitotic cell cycle                       | external encapsulating structure organization and biogenesis |
| regulation of progression through cell cycle | biological regulation          | cell wall organization and biogenesis                  | regulation of progression through mitotic cell cycle   | DNA replication                                              |
| regulation of cell cycle                     | regulation of cellular process | axial bud site selection                               | axial bud site selection                               | reproduction                                                 |
| cell cycle process                           | regulation of cell cycle       | positive regulation of DNA replication                 | cell wall organization and biogenesis                  | regulation of transcription                                  |

Supplementary Table 4: Top five GO categories identified from the list of yeast Swi6 targets determined by ChIP-chip (Harbison et al. 2004).

**Supporting Table 6: Categories for Human E2F1 targets identified by ChIP-chip experiments**

| <b>Hypergeometric</b> | <b>Parent-Child</b>             | <b>Elim</b>                                            | <b>Weight</b>                                | <b>GenGO</b>                          |
|-----------------------|---------------------------------|--------------------------------------------------------|----------------------------------------------|---------------------------------------|
| DNA metabolic process | cell cycle process              | cell division                                          | DNA replication                              | DNA replication                       |
| cell cycle process    | cell cycle                      | DNA replication                                        | mitosis                                      | Double-strand break repair            |
| cell cycle            | DNA metabolic process           | DNA replication initiation                             | cell division                                | mitotic checkpoint                    |
| DNA replication       | response to endogenous stimulus | mitosis                                                | regulation of progression through cell cycle | mitotic syster chromatid segregation  |
| cell cycle phase      | regulation of cell cycle        | regulation of cyclin-dependent protein kinase activity | DNA repair                                   | G2/M transition of mitotic cell cycle |

Supplementary Table 5: Top five GO categories identified from the list of human E2F1 targets determined by ChIP-chip (Ren et al. 2002).
